# Supplementary material for: Retrieval algorithm for aerosol effective height from the Geostationary Environment Monitoring Spectrometer (GEMS)
Source: Copernicus journal article supplement (doi:10.5194/amt-18-2241-2025), 2025-05-26
Supplement: Supplementary file 1 [file amt-18-2241-2025-supplement.pdf]

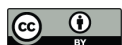

*Supplement of*

## **Retrieval algorithm for aerosol effective height from the Geostationary Environment Monitoring Spectrometer (GEMS)**

**Sang Seo Park et al.**

*Correspondence to:* Sang Seo Park ([sangseopark@unist.ac.kr](mailto:sangseopark@unist.ac.kr))

The copyright of individual parts of the supplement might differ from the article licence.

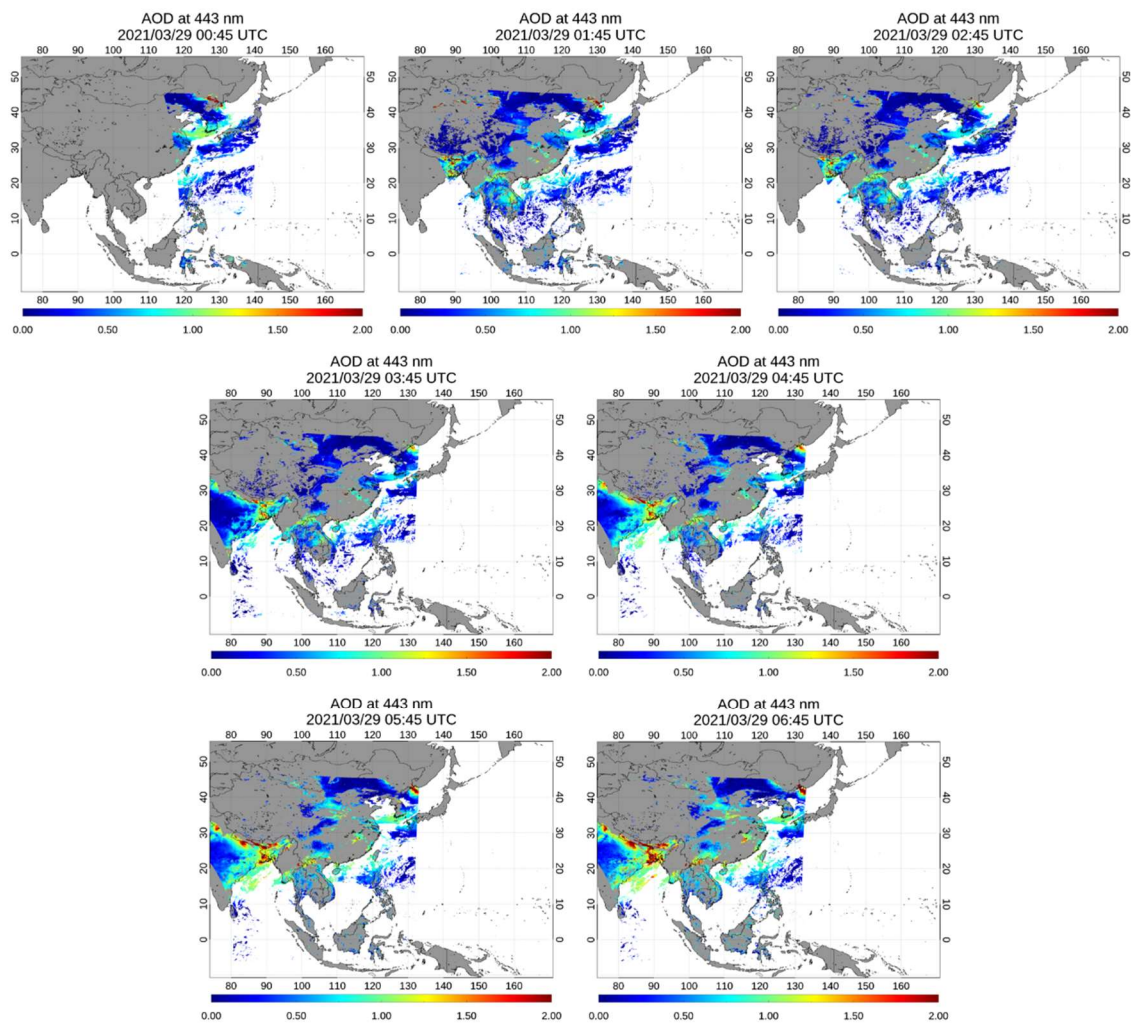

**Figure S1.** Case study results for AOD at 443 nm based on GEMS observations on March 29, 2021.

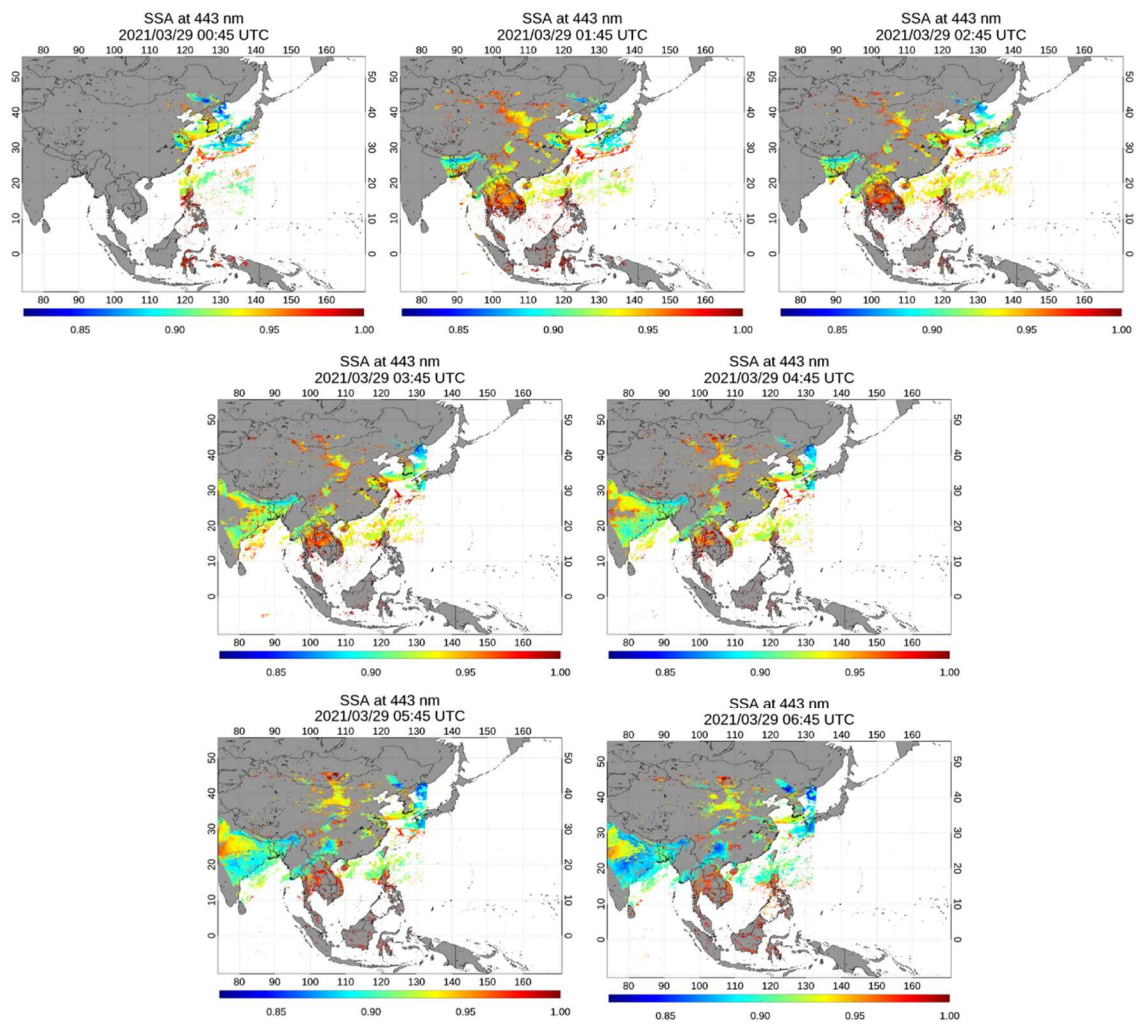

**Figure S2.** Case study results for SSA at 443 nm based on GEMS observations on March 29, 2021.

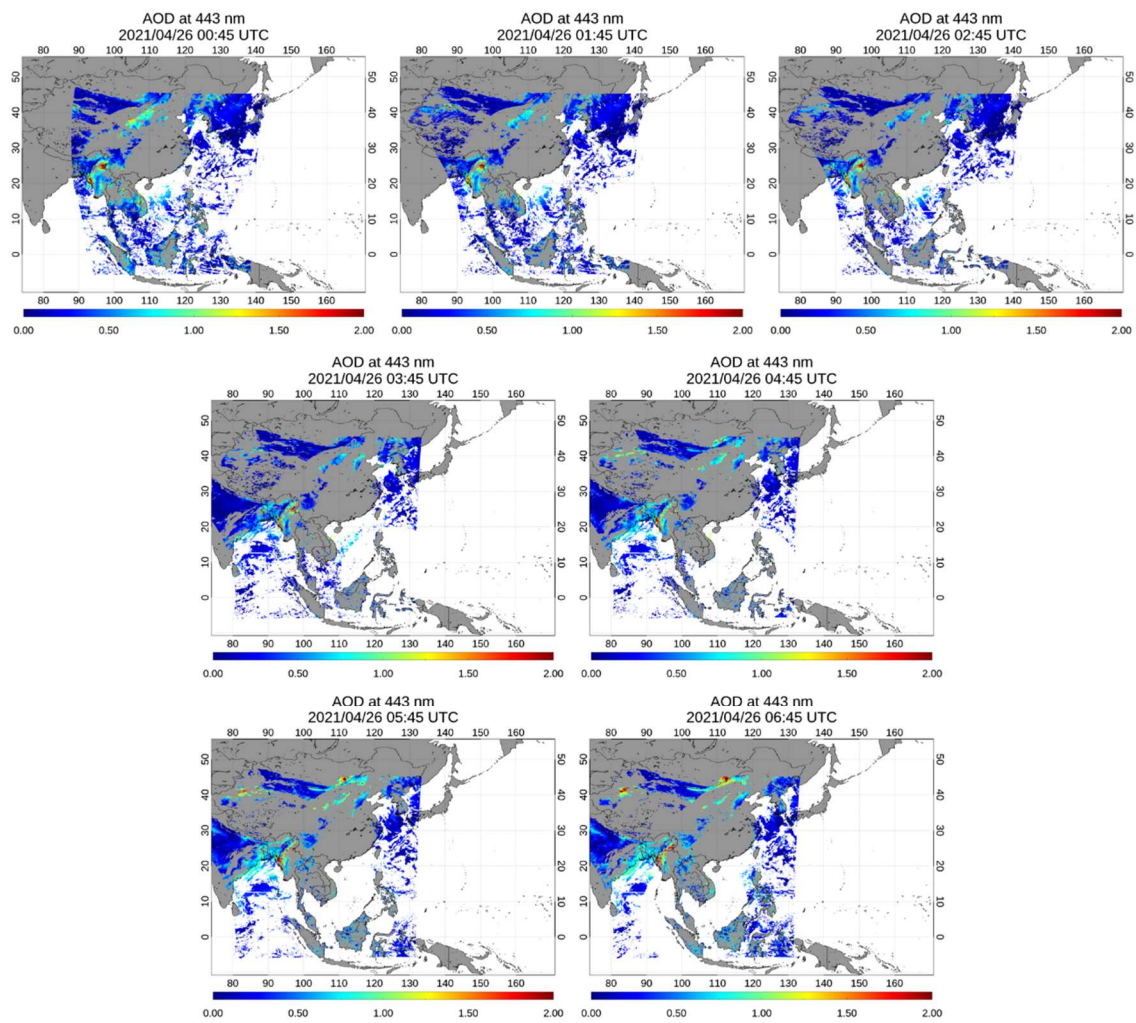

**Figure S3.** Case study results for AOD at 443 nm based on GEMS observations on April 26, 2021.



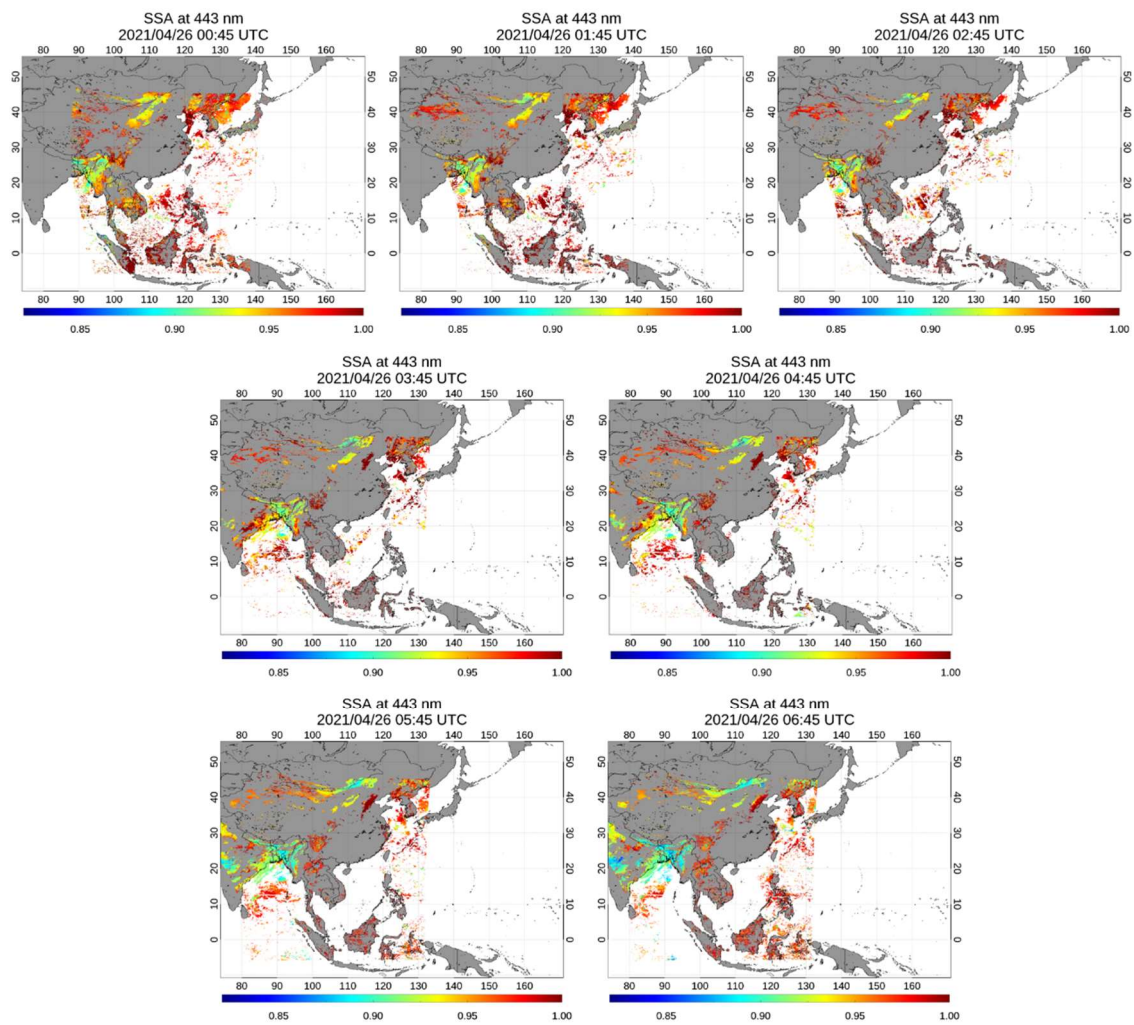

**Figure S4.** Case study results for SSA at 443 nm based on GEMS observations on April 26, 2021.
